# Supplementary material for: The semaphorin 3A/neuropilin-1 pathway promotes clonogenic growth of glioblastoma via activation of TGF-β signaling
Source: PubMed Central journal article supplement (PMC10721275; doi:10.1172/jci.insight.167049), 2023-11-08

## Supplemental Information

**Supplemental table 1: A mitogen screen using GSCs and NPCs**

|                   | 131     |       | 827    |       | NPC1   |       | NPC2  |       |
|-------------------|---------|-------|--------|-------|--------|-------|-------|-------|
|                   | Mean    | SD    | Mean   | SD    | Mean   | SD    | Mean  | SD    |
| untreated control | 5.389   | 0.180 | 4.744  | 0.068 | 0.812  | 0.204 | 0.750 | 0.204 |
| EGF               | 81.417  | 2.242 | 65.917 | 1.083 | 9.917  | 0.110 | 6.833 | 1.167 |
| bFGF              | 23.890  | 1.800 | 28.667 | 2.075 | 4.375  | 0.552 | 6.292 | 0.150 |
| EGF+bFGF          | 111.540 | 5.342 | 74.322 | 4.342 | 12.460 | 2.445 | 8.984 | 1.452 |
| HGF               | 27.958  | 1.522 | 12.389 | 0.180 | 3.240  | 0.667 | 2.873 | 0.331 |
| beta-NGF          | 8.625   | 0.580 | 9.556  | 0.515 | 2.528  | 0.778 | 3.222 | 0.068 |
| NT-3              | 5.500   | 0.637 | 3.472  | 0.646 | 0.760  | 0.177 | 0.783 | 0.114 |
| BDNF              | 6.708   | 1.017 | 4.583  | 0.454 | 1.958  | 0.184 | 2.528 | 0.148 |
| Semaphorin 3A     | 27.250  | 3.146 | 14.958 | 2.765 | 0.775  | 0.125 | 0.317 | 0.218 |
| Semaphorin 3B     | 3.486   | 1.195 | 5.875  | 1.816 | 0.867  | 0.326 | 1.083 | 0.505 |
| Semaphorin 3C     | 9.292   | 5.745 | 6.463  | 2.253 | 1.153  | 0.417 | 0.992 | 0.126 |
| Semaphorin 3D     | 5.917   | 1.134 | 2.992  | 1.125 | 0.750  | 0.250 | 0.708 | 0.260 |
| Semaphorin 3E     | 3.494   | 1.706 | 2.875  | 1.192 | 0.708  | 0.191 | 0.861 | 0.427 |
| Semaphorin 5A     | 8.861   | 3.071 | 7.250  | 3.279 | 0.725  | 0.214 | 0.917 | 0.391 |
| Semaphorin 6A     | 7.069   | 1.209 | 5.069  | 1.916 | 0.883  | 0.347 | 1.069 | 0.295 |
| Semaphorin 6D     | 2.403   | 1.144 | 3.403  | 0.690 | 0.583  | 0.144 | 0.708 | 0.191 |
| Slit3             | 5.917   | 0.813 | 4.617  | 0.586 | 0.750  | 0.250 | 0.792 | 0.315 |
| Slit1             | 5.733   | 1.783 | 4.408  | 0.396 | 0.875  | 0.125 | 0.833 | 0.382 |
| RGM-B             | 3.319   | 0.856 | 4.580  | 0.640 | 0.875  | 0.139 | 0.817 | 0.388 |
| RGM-A             | 3.528   | 0.937 | 3.403  | 0.945 | 0.708  | 0.191 | 0.683 | 0.161 |
| Ephrin-A1         | 3.611   | 2.014 | 3.992  | 0.647 | 0.775  | 0.115 | 0.583 | 0.629 |
| Ephrin-A5         | 5.319   | 2.341 | 4.792  | 0.688 | 0.808  | 0.170 | 0.417 | 0.382 |
| Ephrin-B2         | 8.653   | 3.623 | 5.125  | 4.823 | 0.692  | 0.201 | 0.708 | 0.191 |
| Ephrin-B1         | 7.833   | 3.001 | 8.667  | 3.711 | 0.708  | 0.191 | 0.667 | 0.289 |
| Neuroigin 1       | 4.986   | 0.307 | 5.075  | 0.385 | 0.833  | 0.315 | 1.083 | 0.520 |
| Neuroigin 2       | 4.528   | 1.100 | 6.875  | 1.231 | 0.733  | 0.225 | 1.542 | 0.711 |
| Neuroigin 3       | 11.861  | 1.737 | 7.542  | 2.688 | 1.336  | 0.604 | 0.950 | 0.189 |
| Nogo-A            | 7.319   | 2.260 | 6.833  | 3.138 | 0.783  | 0.125 | 0.686 | 0.681 |
| Omgp              | 6.490   | 1.593 | 5.235  | 0.936 | 0.828  | 0.423 | 0.932 | 0.782 |

We chose 24 recombinant proteins that are critical regulators of synaptic adhesion, axon guidance, and neurotropic functions. Both GBM cells and NPCs were plated at varying seeding densities (5 to 200 cells per well) in serum-free media and then their growth was evaluated two weeks later by counting the number of resultant spheres.

## Supplemental figure legends

### Figure S1. *Sema3A* induces GBM cell proliferation via *NRP1*.

(A) LDA analysis to determine clonogenic growth of GBM cells (131, 387 and 559) treated with or without r*Sema3A*. Varying number of cells (1 to 100) was seeded into the each well (30 per each condition) and allowed to grow. Wells without sphere formation were counted. \* $p < 0.01$  by pairwise t test.

(B) LDA analysis to determine clonogenic growth of GSCs (131, 387, 83) with *NRP1* shRNA or with NT shRNA. \* $p < 0.01$  by pairwise t test.

### Figure S2. The *Sema3A-NRP1-TGF $\beta$ RI* signaling axis in GBM

(A and B) Co-immunoprecipitation (Co-IP) analysis of *NRP1* and *TGF $\beta$ RI* in patient derived GBM tumors (047, 050) and the derivative cells (131, 559, 83). IgG represents a control antibody used for IPs.

(C) Immunoblots of pSMAD2 and total SMAD2 expression in patient derived GBM cells (559 and 047) and NPCs treated with or without r*Sema3A*.

(D) Co-IP analyses of *NRP1* (WT), *NRP1* mutant (MT), and *TGF $\beta$ RI* proteins in 387 GBM cells treated with r*Sema3A*. IgG represents a control antibody used for IPs.

(E) Immunoblots of pSMAD2 and total SMAD2 expression in V5-tagged wild type *NRP1* (WT) and *NRP1* mutant (MT) treated with or without r*Sema3A*.

(F) Short-term proliferation analysis of 387 GBM cells overexpressing the control vector, wild type *NRP1*, or *NRP1* mutant vector. These cells were treated with or without r*Sema3A*.  $n = 3$ . Data represent mean  $\pm$  SD. \* $p < 0.01$  by one-way ANOVA with Tukey's multiple comparison test in F. NS represents non-significant.

### **Figure S3. Characterization of TGF $\beta$ RI-T204D protein**

(A) Immunoblots of TGF $\beta$ RI, pSMAD2 and SMAD2 in GBM cells expressing a constitutively active TGF $\beta$  type I receptor (*TGF $\beta$ RI-T204D*).

(B) Short-term proliferation analysis of 131 and 559 GBM cells expressing TGF $\beta$ RI-T204D protein. n = 3. Data represent mean  $\pm$  SD. \*p < 0.01 by one-way ANOVA. NS represents non-significant.

(C) LDA analysis of 131 and 559 GBM cells expressing TGF $\beta$ RI-T204D protein. \*p < 0.01 by pairwise t test.

### **Figure S4. Correlations between the expression levels of *NRP1* and *Sema3A* or *TGFR $\beta$ 1* in LGG/GBM specimens.**

*In silico* analyses showing positive correlations between *NRP1* and *Sema3A* or *TGFR $\beta$ 1* (n=667). r values were calculated by Pearson's correlation test. All analyses were performed using GlioVis (<http://gliovis.bioinfo.cnio.es/>) (1).

### **Figure S5. Correlation between *NRP1* mRNA levels and TGF $\beta$ activity in gliomas.**

(A) Heat map plot of glioma subtypes and TGF $\beta$  activity based on the *NRP1* mRNA levels.

(B) Correlation between *NRP1* mRNA and TGF $\beta$  activity in gliomas. n = 157. r values were calculated by Pearson's correlation test. \*p < 0.00001

## Reference

1. Bowman RL, Wang Q, Carro A, Verhaak RG, and Squatrito M. GlioVis data portal for visualization and analysis of brain tumor expression datasets. *Neuro Oncol.* 2017;19(1):139-41.

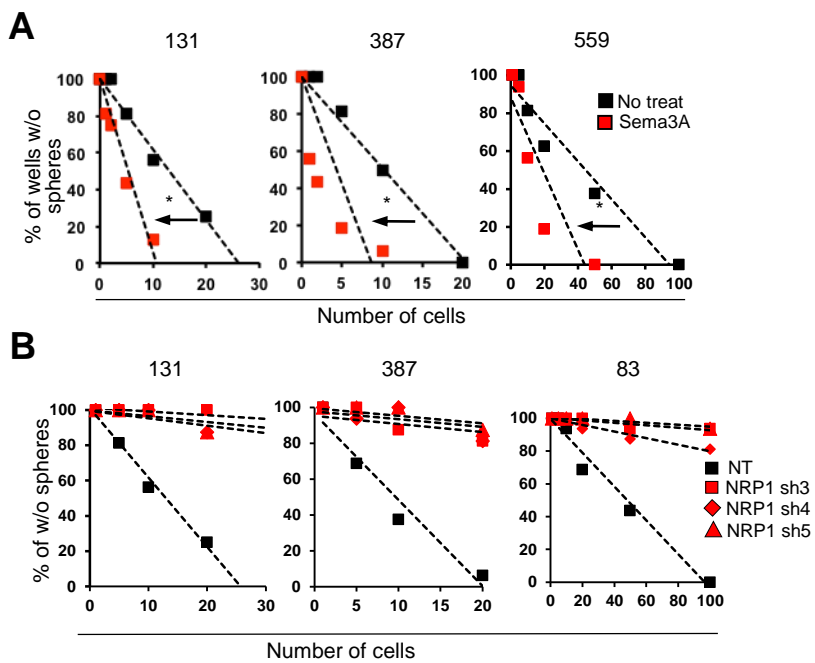

**Figure S1**

**A**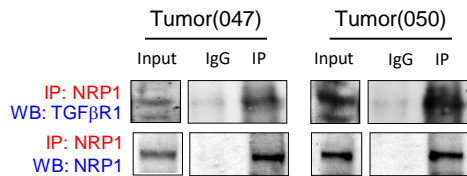**B**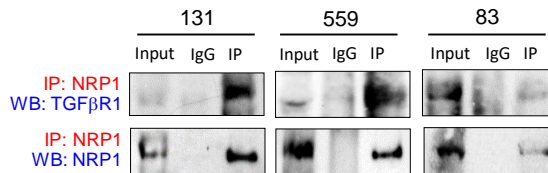**C**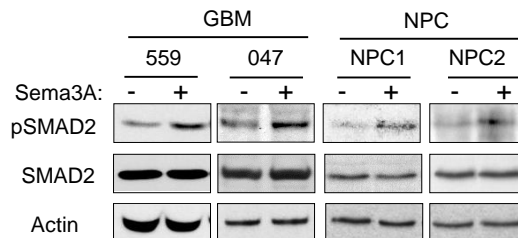**D**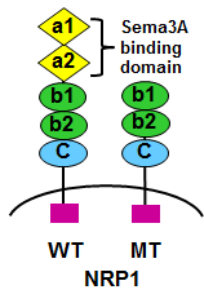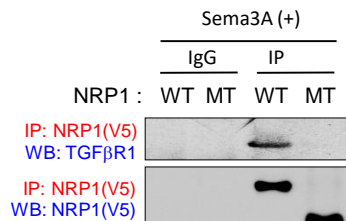**E**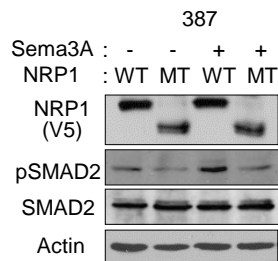**F**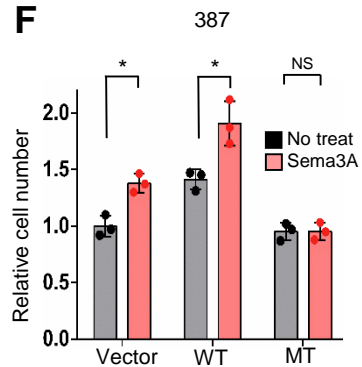**Figure S2**

**A**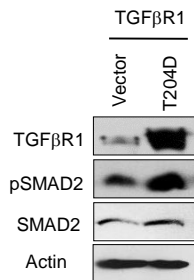**B**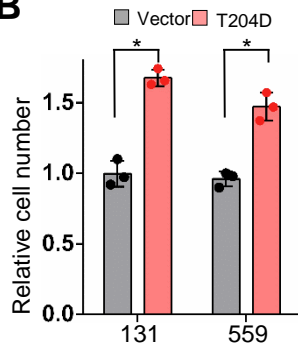**C**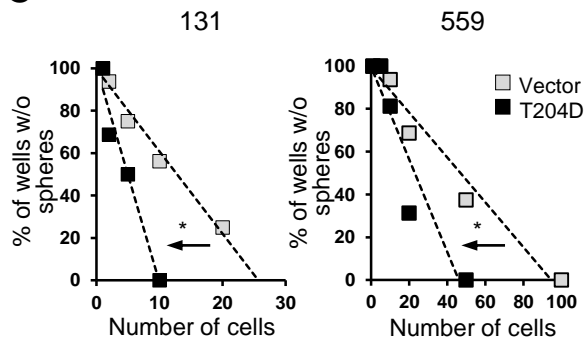**Figure S3**

TCGA data set (LGG/GBM)

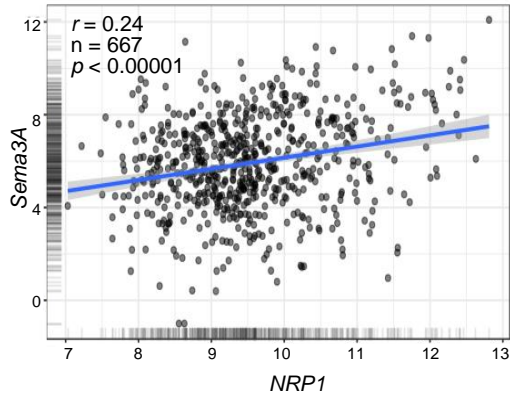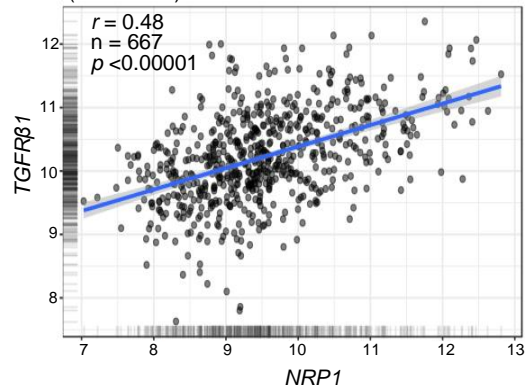

Figure S4



**A**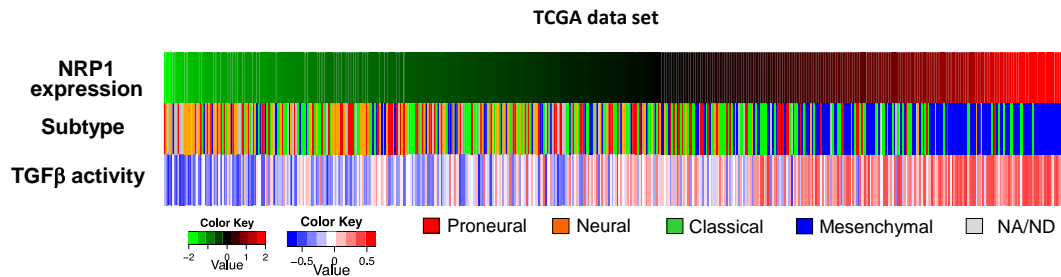**B**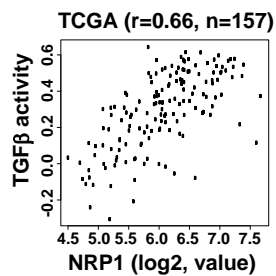

Supplement: jciinsight-8-167049-s044.pdf [file jciinsight-8-167049-s044.pdf]
